# Supplementary material for: Robust, multifunctional flood defenses in the Dutch rural riverine area
Source: Copernicus journal article supplement (doi:10.5194/nhess-14-1085-2014), 2014-05-12

Supplement of Nat. Hazards Earth Syst. Sci., 14, 1085–1098, 2014  
<http://www.nat-hazards-earth-syst-sci.net/nhess-14-1085-2014/>  
doi:10.5194/nhess-14-1085-2014-supplement  
© Author(s) 2014. CC Attribution 3.0 License.

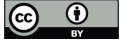

Natural Hazards  
and Earth System  
Sciences

Open Access

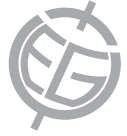

*Supplement of*

## **Robust, multifunctional flood defenses in the Dutch rural riverine area**

**J. M. van Loon-Steensma and P. Vellinga**

*Correspondence to:* J. M. van Loon-Steensma ([jantsje.vanloon@wur.nl](mailto:jantsje.vanloon@wur.nl))

## Supplement 1

This Supplement presents an impression of each of the five study-locations. The aerial photographs are from Google-earth, and the 'ground' photographs are by the authors, and by Hanneke Elema (the photograph of the Grebbedijk). The approximate location of the ground photograph is indicated by a white star.

### Situation Streefkerk

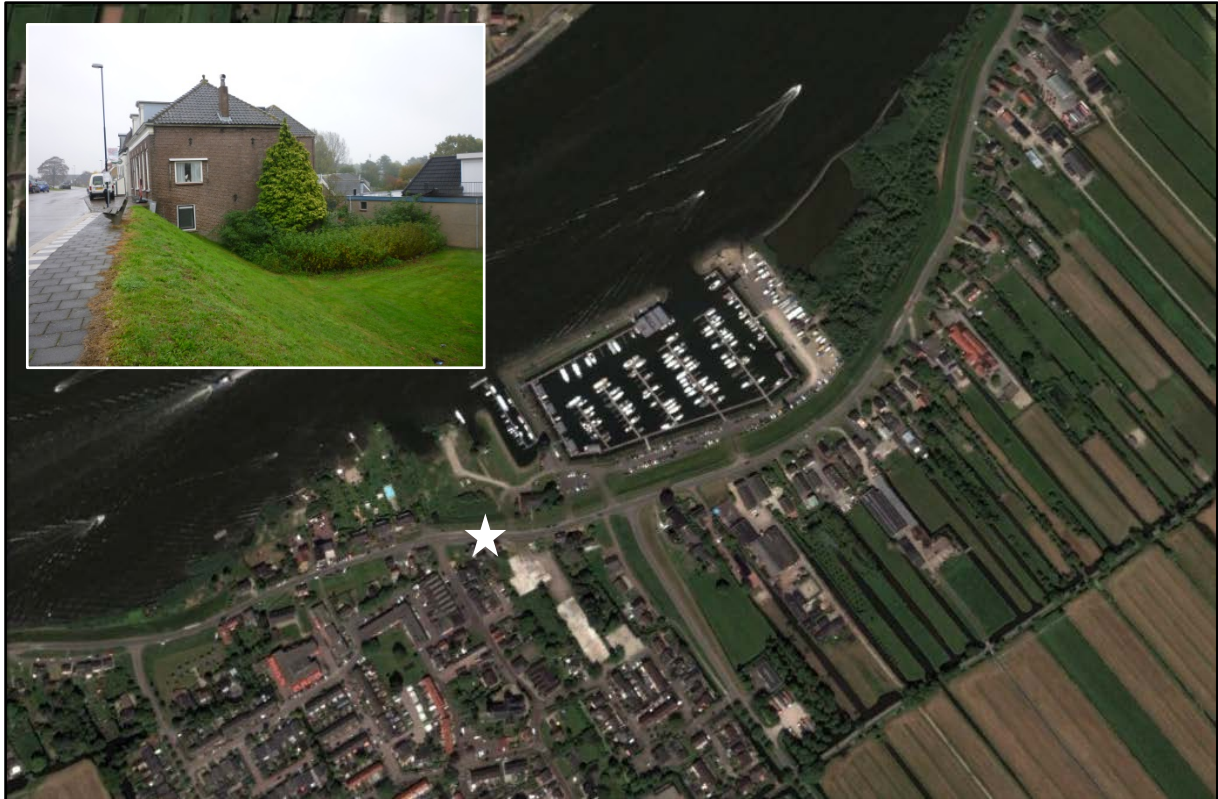

Situation Marsdijk

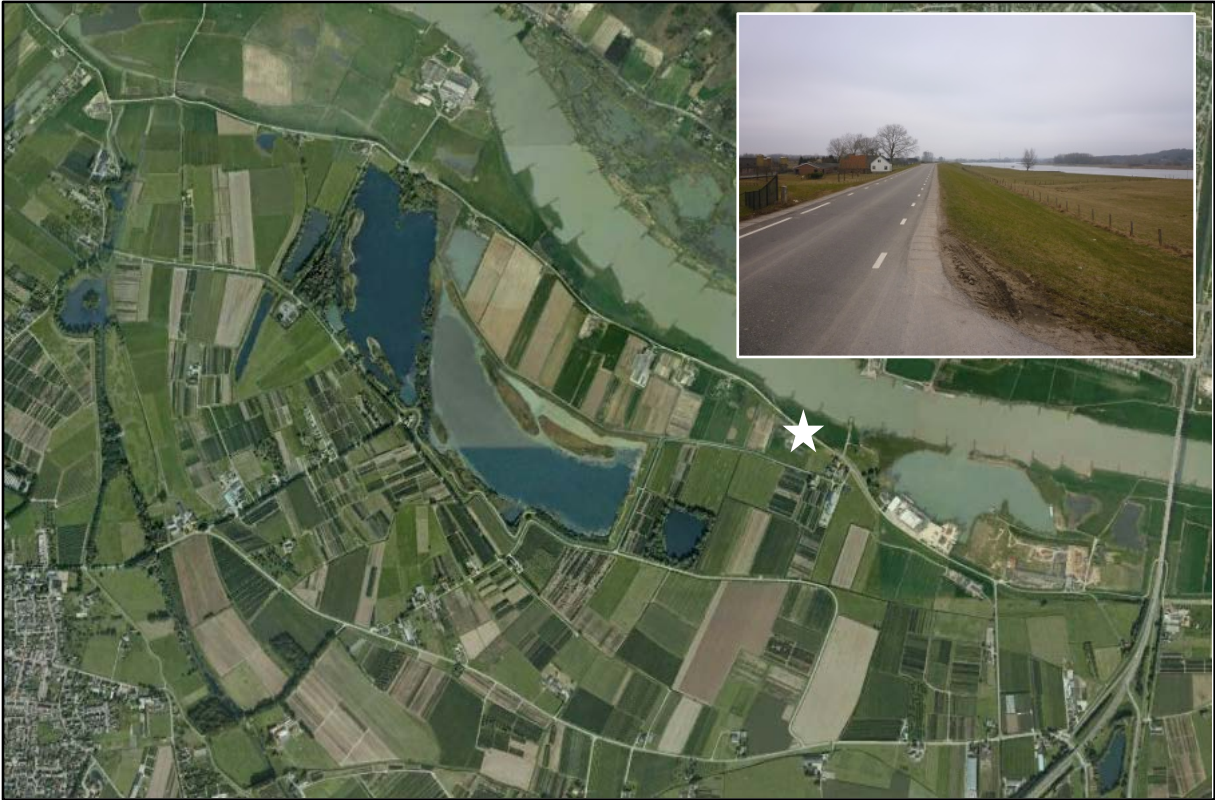



Situation Arnhem (Bakenhof)

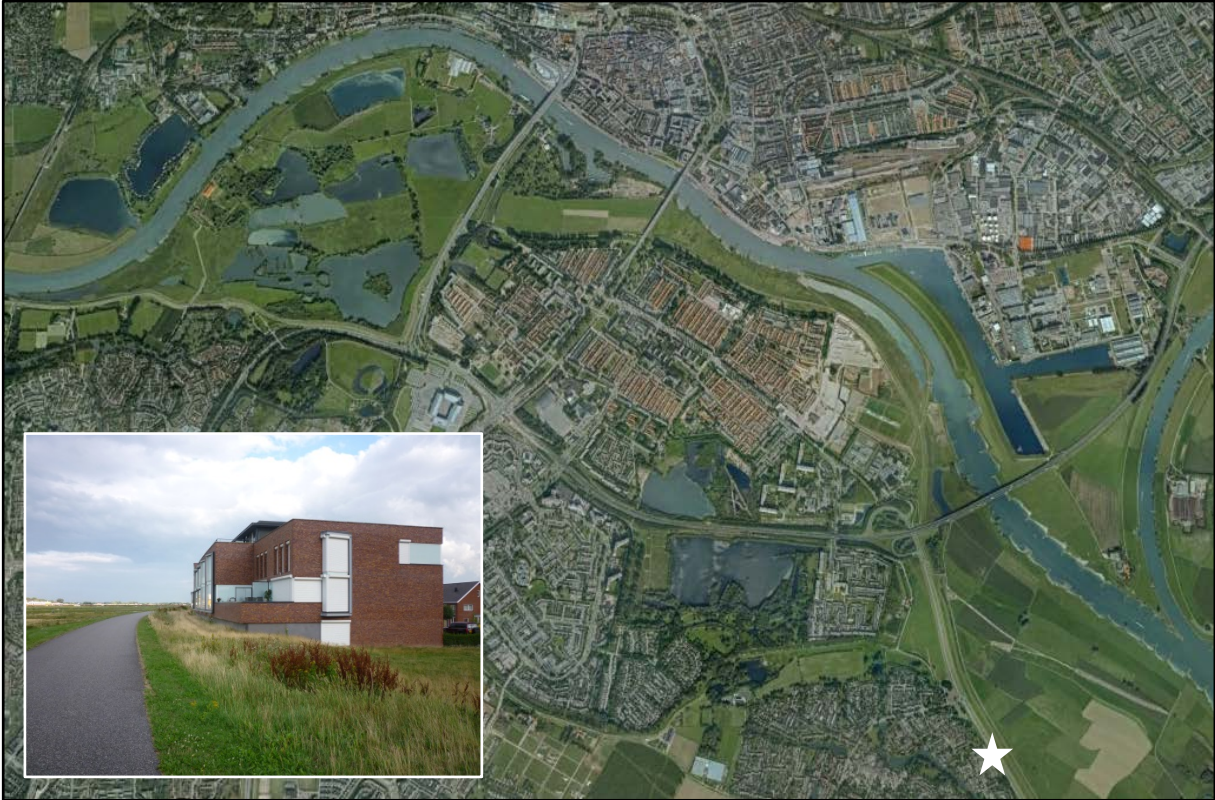

Situation Grebbedijk

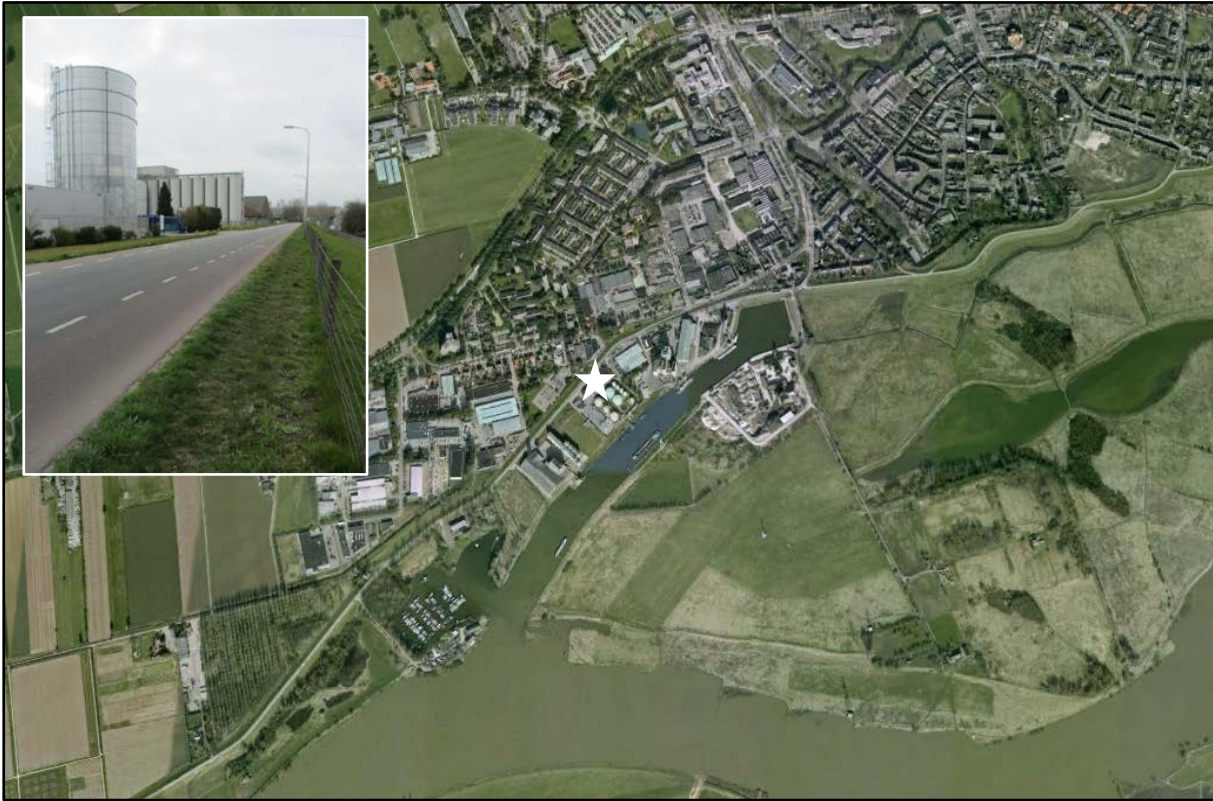



Situation Munnikenland

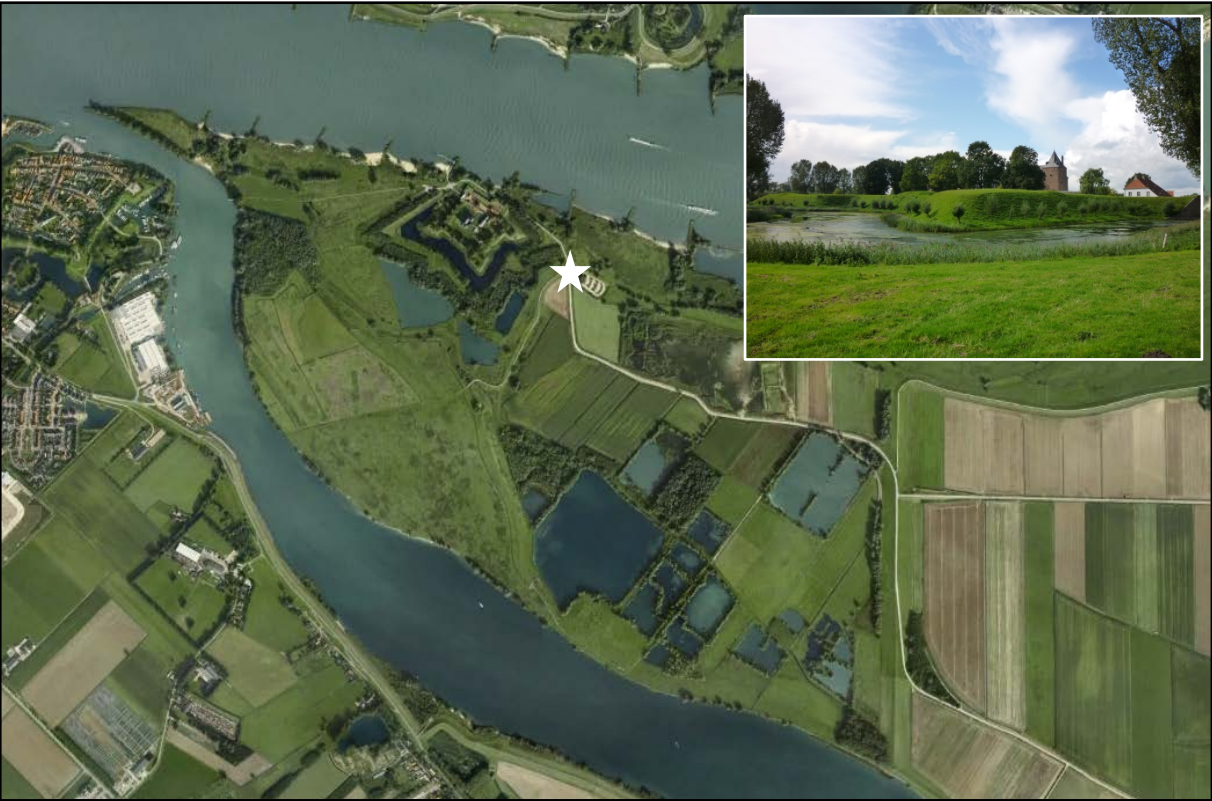

Supplement: Supplementary file 1 [file nhess-14-1085-2014-supplement.pdf]
